# Supplementary material
Source: ML conference proceedings conference paper supplement (https://openreview.net/forum?id=Wu0W5BJ7UR)
Supplement: supplementary_material [file Dynamic_Regime_Shifts_Report.pdf › AgenticAI_supplemetary/Dynamic_Regime_Shifts_Report.pdf]

# Dynamic Regime Shifts in Market Portfolios: A Factor Modeling Approach

## 1. Introduction

Financial markets exhibit time-varying dynamics that challenge traditional asset pricing and portfolio allocation.

Classical factor models such as the Capital Asset Pricing Model (CAPM) [Sharpe, 1964; Lintner, 1965] and the Fama–French multi-factor models [Fama & French, 1993] assume stable relationships between risk factors and asset returns. Yet, empirical evidence shows that these relationships may shift across regimes, influenced by macroeconomic conditions, crises, and structural changes [Ang & Bekaert, 2002].

The study of dynamic regime shifts—periods in which the statistical properties of returns and factor loadings abruptly change—has gained attention in both finance and econometrics. Regime-switching models, such as Hamilton’s Markov Switching Model [Hamilton, 1989], have been widely used to capture such non-linear dynamics. More recent literature integrates factor modeling with regime shifts to analyze portfolio risks under varying economic states [Pastor & Stambaugh, 2003; Guidolin & Timmermann, 2007].

Goal of this study: This report develops and tests a dynamic factor model with regime shifts to analyze market portfolio returns. By incorporating regime-dependence into factor exposures, we aim to (i) identify latent regimes, (ii) assess shifts in factor sensitivities, and (iii) evaluate the implications for portfolio management and risk forecasting.

## 2. Literature Review

Factor models:

- CAPM: Market as the single risk factor [Sharpe, 1964].
- Multi-factor models: SMB, HML, momentum, quality, profitability [Fama & French, 1993, 2015].

Regime-switching in finance:

- Hamilton (1989): Markov regime-switching in GDP growth.
- Ang & Bekaert (2002): International stock returns and regime-switching volatility.
- Guidolin & Timmermann (2007): Asset allocation under multiple regimes.

Dynamic factor models:

- Stock & Watson (2002): Dynamic factor models for macroeconomic forecasting.
- Bai & Ng (2002): Consistency in estimating large factor models.

Recent work integrates ML methods such as hidden Markov models, recurrent neural nets,

and Bayesian nonparametrics for regime detection [Lamoureux & Lastrapes, 1990; Nguyen & Yin, 2022].

Gap: Few studies directly combine factor modeling of portfolios with explicit, dynamic regime shifts in factor exposures. This work explores that intersection.

### 3. Hypotheses and Methodology

Hypotheses:

H1: Market portfolio factor loadings vary across latent regimes.

H2: Regime shifts correspond to major economic or volatility events (e.g., crises, recoveries).

H3: Incorporating regime-dependent factor exposures improves portfolio risk-adjusted performance relative to static factor models.

Methodology:

Model setup: Start with Fama–French five-factor model:

$$R_{i,t} - R_{f,t} = \alpha + \beta_{M,t}(R_{M,t} - R_{f,t}) + \beta_{SMB,t}SMB_t + \beta_{HML,t}HML_t + \beta_{RMW,t}RMW_t + \beta_{CMA,t}CMA_t + \epsilon_t$$

Extend with regime-dependent loadings using a Markov Switching structure:

$$\beta_{k,t} = \beta_k(st), \quad st \in \{1, 2, \dots, K\}$$

where  $st$  is a latent regime variable governed by a first-order Markov process.

Estimation approach:

- Maximum likelihood estimation with EM algorithm for latent regimes [Hamilton, 1989].
- Alternative: Bayesian estimation with Gibbs sampling for robustness [Kim & Nelson, 1999].

Evaluation:

- Likelihood ratio tests for regime existence.
- Compare out-of-sample predictive performance of dynamic regime-switching factor model vs static Fama–French model.
- Economic evaluation: portfolio backtests (Sharpe ratio, drawdown, turnover).

### 4. Data Creation

Data source: CRSP for US stock returns; Fama–French factors from Kenneth French's online data library.

Period: 1980–2025 (monthly returns).

Variables: Market excess return, SMB, HML, RMW, CMA, risk-free rate.

Portfolio proxy: CRSP value-weighted market portfolio.

Preprocessing: Winsorization at 1% tails; normalization of factors for stability.

Synthetic regime indicators (optional for validation): Use NBER recession dates or VIX spikes

as proxies to compare with latent regime identification.

## 5. Results

(to be filled with your empirical analysis)

- Regime identification: e.g., 2–3 regimes corresponding to “bull,” “bear,” and “high-volatility” markets.
- Factor sensitivity: SMB and HML loadings higher in recessionary regimes; market beta elevated in crisis regimes.
- Portfolio implications: Regime-switching model yields higher risk-adjusted returns than static models; reduces downside risk.
- Robustness checks: Out-of-sample predictions, subperiod analyses, Bayesian vs ML estimation consistency.

## 6. Conclusion

Key findings: Market factor exposures are not stable; they shift systematically across regimes.

Contributions: Demonstrates the usefulness of combining factor modeling with regime-switching methods for portfolio management.

Implications: Regime-aware factor modeling can improve risk forecasting, portfolio allocation, and stress testing.

Future research: Explore higher-dimensional dynamic factor models, deep learning approaches for regime classification, and cross-market applications (crypto, commodities, international equity).

## References

- Ang, A., & Bekaert, G. (2002). International asset allocation with regime shifts. *Review of Financial Studies*, 15(4).
- Bai, J., & Ng, S. (2002). Determining the number of factors in approximate factor models. *Econometrica*.
- Fama, E. F., & French, K. R. (1993). Common risk factors in stock and bond returns. *Journal of Financial Economics*.
- Guidolin, M., & Timmermann, A. (2007). Asset allocation under multivariate regime switching. *Journal of Economic Dynamics and Control*.
- Hamilton, J. D. (1989). A new approach to the economic analysis of nonstationary time series and the business cycle. *Econometrica*.
- Kim, C. J., & Nelson, C. R. (1999). *State-Space Models with Regime Switching*. MIT Press.
- Pastor, L., & Stambaugh, R. F. (2003). Liquidity risk and expected stock returns. *Journal of Political Economy*.
- Stock, J. H., & Watson, M. W. (2002). Forecasting using principal components from a large

number of predictors. Journal of the American Statistical Association.
